# Supplementary material for: The Spherical Evolutionary Multi-Objective (SEMO) Algorithm for Identifying Disease Multi-Locus SNP Interactions
Source: MDPI journal article supplement (doi:10.3390/genes15010011), 2023-12-20
Supplement: s1 [file s1]

Supplementary File

# Supplementary File of “The Spherical Evolutionary Multi-Objective (SEMO) Algorithm for Identifying Disease Multi-Locus SNP Interactions”

Fuxiang Ren <sup>1</sup>, Shiyin Li <sup>1</sup>, Zihao Wen <sup>2, 3, \*</sup>, Yidi Liu <sup>1</sup> and Deyu Tang <sup>1,2, \*</sup>

<sup>1</sup> School of Medical Information Engineering, Guangdong Pharmaceutical University, Guangzhou 510006, China; renfuxiang163@163.com (F.R.); shiyyy0326@163.com (S.L.); 17803873294@163.com (Y.L.)

<sup>2</sup> School of Mathematics and Informatics, College of Software Engineering, South China University, Guangzhou 510642, China

<sup>3</sup> Faculty of Information Technology, Monash University, Melbourne, VIC 3800, Australia

\* Correspondence: zihao.wen@scau.edu.cn (Z.W.); tangdeyu2023@scau.edu.cn (D.T.)

## 1. An example of a contingency table for a SNP mode

**Table S1.** Example of a contingency table of counts for a SNP model.

| Disease status     |                             | Genotype combination of SNP |     |     |     |      |     |     |     |     |     |
|--------------------|-----------------------------|-----------------------------|-----|-----|-----|------|-----|-----|-----|-----|-----|
|                    |                             | 0-0                         | 0-1 | 0-2 | 1-0 | 1-1  | 1-2 | 2-0 | 2-1 | 2-2 | Sum |
| (N <sub>ij</sub> ) | Number of Case samples      | 12                          | 10  | 3   | 5   | 8    | 4   | 5   | 6   | 2   | 55  |
|                    | Number of Control samples   | 15                          | 5   | 8   | 6   | 15   | 6   | 5   | 8   | 7   | 75  |
|                    | Sum (case, control)         | 27                          | 15  | 11  | 11  | 23   | 10  | 10  | 14  | 9   | 130 |
| (E <sub>ij</sub> ) | Expected number of Cases    | 11.4                        | 6.3 | 4.7 | 4.7 | 9.7  | 4.2 | 4.2 | 5.9 | 3.8 | 55  |
|                    | Expected number of Controls | 15.6                        | 8.7 | 6.3 | 6.3 | 13.3 | 5.8 | 5.8 | 8.1 | 5.2 | 75  |

## 2. Disease modelling without marginal effects (DNME)

The DNME disease model indicates that individual SNPs have no main effect, but several specific SNPs have a strong upward effect when combined together[28; 29]. In the DNME model, we generated 10 simulated datasets with MAFs set to 0.2 and 0.4 for disease-relevant loci and 0.01, 0.05, 0.2 and 0.4 for heritability  $h^2$ . The MAFs for disease irrelevant loci also obeyed the uniform distribution of [0.01, 0.5]. The exogeneity values of the DNME disease model for the nine different parameters were as shown in Table S1.

**Table S2.** Parameter settings for 12 DNME models

| DNME-1 | P(D)=0.1, $h^2$ =0.05, MAF=0.2 |        |        | DNME-2 | P(D)=0.1, $h^2$ =0.01, MAF=0.2 |        |        |
|--------|--------------------------------|--------|--------|--------|--------------------------------|--------|--------|
|        | AA                             | Aa     | aa     |        | AA                             | Aa     | aa     |
| BB     | 0.6377                         | 0.4884 | 0.3826 | BB     | 0.2216                         | 0.2758 | 0.1414 |
| Bb     | 0.4638                         | 0.7645 | 0.9566 | Bb     | 0.2587                         | 0.1690 | 0.4013 |
| bb     | 0.5798                         | 0.5624 | 0.7189 | bb     | 0.2781                         | 0.1279 | 0.4196 |
| DNME-3 | P(D)=0.1, $h^2$ =0.05, MAF=0.2 |        |        | DNME-4 | P(D)=0.1, $h^2$ =0.01, MAF=0.2 |        |        |
|        | AA                             | Aa     | aa     |        | AA                             | Aa     | aa     |
| BB     | 0.4988                         | 0.6388 | 0.7649 | BB     | 0.1391                         | 0.1882 | 0.2214 |
| Bb     | 0.6665                         | 0.3887 | 0.0831 | Bb     | 0.1901                         | 0.1114 | 0.0198 |
| bb     | 0.5430                         | 0.5265 | 0.9533 | bb     | 0.2056                         | 0.0514 | 0.2530 |
| DNME-5 | P(D)=0.1, $h^2$ =0.05, MAF=0.2 |        |        | DNME-6 | P(D)=0.1, $h^2$ =0.01, MAF=0.4 |        |        |
|        | AA                             | Aa     | aa     |        | AA                             | Aa     | aa     |
| BB     | 0.2121                         | 0.3503 | 0.1161 | BB     | 0.1032                         | 0.0634 | 0.1242 |
| Bb     | 0.3364                         | 0.0543 | 0.4948 | Bb     | 0.0978                         | 0.0858 | 0.0693 |

|           |                                              |           |           |           |                                              |           |           |
|-----------|----------------------------------------------|-----------|-----------|-----------|----------------------------------------------|-----------|-----------|
| <b>bb</b> | 0.2272                                       | 0.2727    | 0.4948    | <b>bb</b> | 0.0210                                       | 0.1467    | 0.0595    |
| DNME-7    | <b>P(D)=0.1, h<sup>2</sup>=0.01, MAF=0.4</b> |           |           | DNME-8    | <b>P(D)=0.1, h<sup>2</sup>=0.01, MAF=0.4</b> |           |           |
|           | <b>AA</b>                                    | <b>Aa</b> | <b>aa</b> |           | <b>AA</b>                                    | <b>Aa</b> | <b>aa</b> |
| <b>BB</b> | 0.1852                                       | 0.2908    | 0.2340    | <b>BB</b> | 0.0731                                       | 0.0418    | 0.0146    |
| <b>Bb</b> | 0.2860                                       | 0.2009    | 0.2770    | <b>Bb</b> | 0.0240                                       | 0.0639    | 0.0591    |
| <b>bb</b> | 0.2486                                       | 0.2661    | 0.1657    | <b>bb</b> | 0.0682                                       | 0.0188    | 0.0946    |
| DMNE-9    | <b>P(D)=0.1, h<sup>2</sup>=0.01, MAF=0.4</b> |           |           | DNME-10   | <b>P(D)=0.1, h<sup>2</sup>=0.01, MAF=0.4</b> |           |           |
|           | <b>AA</b>                                    | <b>Aa</b> | <b>aa</b> |           | <b>AA</b>                                    | <b>Aa</b> | <b>aa</b> |
| <b>BB</b> | 0.0462                                       | 0.1275    | 0.0694    | <b>BB</b> | 0.0950                                       | 0.1222    | 0.1267    |
| <b>Bb</b> | 0.1150                                       | 0.0667    | 0.0971    | <b>Bb</b> | 0.0973                                       | 0.1294    | 0.0999    |
| <b>bb</b> | 0.1067                                       | 0.0691    | 0.1085    | <b>bb</b> | 0.2014                                       | 0.0439    | 0.1222    |

\* P(D) is prevalence, h<sup>2</sup> is heritability, and MAF stands for minor allele frequency.

### 3. Disease modelling without marginal effects (DME)

DME disease model usually refers to a model in which one or more SNPs have marginal effects, but the interaction effect is stronger for all SNPs combined. In the DME model, we set the MAFs of disease-associated loci to 0.05, 0.1, 0.2, and 0.5 to generate different simulated datasets, while the MAFs of disease-unassociated loci obeyed a uniform distribution of [0.01, 0.5]. Minor Allele Frequency (MAF) is the frequency of occurrence of a minor common allele in a given population. Prevalence is the proportion of a given population found to be affected by a disease. Prevalence P(D) is the probability that a specific population is affected by a SNP-interacting disease model. Heritability h<sup>2</sup> is the phenotypic change affected by the SNP-interacting disease model. The different parameter settings for the 12 DME models are in Table S2.

**Table S3.** Parameter settings for 10 DME models

|           |                                                |           |           |           |                                               |           |           |
|-----------|------------------------------------------------|-----------|-----------|-----------|-----------------------------------------------|-----------|-----------|
| DME-1     | <b>P(D)=0.1, h<sup>2</sup>=0.005, MAF=0.05</b> |           |           | DME-2     | <b>P(D)=0.1, h<sup>2</sup>=0.005, MAF=0.1</b> |           |           |
|           | <b>AA</b>                                      | <b>Aa</b> | <b>aa</b> |           | <b>AA</b>                                     | <b>Aa</b> | <b>aa</b> |
| <b>BB</b> | 0.0980                                         | 0.0980    | 0.0980    | <b>BB</b> | 0.0960                                        | 0.0960    | 0.0960    |
| <b>Bb</b> | 0.0980                                         | 0.2989    | 0.5222    | <b>Bb</b> | 0.0960                                        | 0.1971    | 0.2824    |
| <b>bb</b> | 0.0980                                         | 0.5222    | 0.9121    | <b>bb</b> | 0.0960                                        | 0.2824    | 0.4047    |
| DME-3     | <b>P(D)=0.1, h<sup>2</sup>=0.005, MAF=0.2</b>  |           |           | DME-4     | <b>P(D)=0.1, h<sup>2</sup>=0.005, MAF=0.5</b> |           |           |
|           | <b>AA</b>                                      | <b>Aa</b> | <b>aa</b> |           | <b>AA</b>                                     | <b>Aa</b> | <b>aa</b> |
| <b>BB</b> | 0.0921                                         | 0.0921    | 0.0921    | <b>BB</b> | 0.0782                                        | 0.0782    | 0.0782    |
| <b>Bb</b> | 0.0921                                         | 0.1445    | 0.1810    | <b>Bb</b> | 0.0782                                        | 0.1054    | 0.1223    |
| <b>bb</b> | 0.0921                                         | 0.1810    | 0.2266    | <b>bb</b> | 0.0782                                        | 0.1223    | 0.1420    |
| DME-5     | <b>P(D)=0.1, h<sup>2</sup>=0.02, MAF=0.05</b>  |           |           | DME-6     | <b>P(D)=0.1, h<sup>2</sup>=0.02, MAF=0.1</b>  |           |           |
|           | <b>AA</b>                                      | <b>Aa</b> | <b>aa</b> |           | <b>AA</b>                                     | <b>Aa</b> | <b>aa</b> |
| <b>BB</b> | 0.0958                                         | 0.0958    | 0.0958    | <b>BB</b> | 0.0918                                        | 0.0918    | 0.0918    |
| <b>Bb</b> | 0.0958                                         | 0.5331    | 0.5331    | <b>Bb</b> | 0.0918                                        | 0.3192    | 0.3192    |
| <b>bb</b> | 0.0958                                         | 0.5331    | 0.5331    | <b>bb</b> | 0.0918                                        | 0.3192    | 0.3192    |
| DME-7     | <b>P(D)=0.1, h<sup>2</sup>=0.02, MAF=0.2</b>   |           |           | DME-82    | <b>P(D)=0.1, h<sup>2</sup>=0.02, MAF=0.5</b>  |           |           |
|           | <b>AA</b>                                      | <b>Aa</b> | <b>aa</b> |           | <b>AA</b>                                     | <b>Aa</b> | <b>aa</b> |
| <b>BB</b> | 0.0804                                         | 0.1918    | 0.1918    | <b>BB</b> | 0.0519                                        | 0.0519    | 0.0519    |
| <b>Bb</b> | 0.1918                                         | 0.0804    | 0.0804    | <b>Bb</b> | 0.0519                                        | 0.1374    | 0.1374    |
| <b>bb</b> | 0.1918                                         | 0.0804    | 0.0804    | <b>bb</b> | 0.0519                                        | 0.1374    | 0.1374    |
| DME-9     | <b>P(D)=0.1, h<sup>2</sup>=0.02, MAF=0.05</b>  |           |           | DME-10    | <b>P(D)=0.1, h<sup>2</sup>=0.02, MAF=0.1</b>  |           |           |

|                                              | AA     | Aa     | aa     |                                              | AA     | Aa     | aa     |
|----------------------------------------------|--------|--------|--------|----------------------------------------------|--------|--------|--------|
| <b>BB</b>                                    | 0.0804 | 0.1918 | 0.1918 | <b>BB</b>                                    | 0.0717 | 0.1636 | 0.1636 |
| <b>Bb</b>                                    | 0.1918 | 0.0804 | 0.0804 | <b>Bb</b>                                    | 0.1636 | 0.0717 | 0.0717 |
| <b>bb</b>                                    | 0.1918 | 0.0804 | 0.0804 | <b>bb</b>                                    | 0.1636 | 0.0717 | 0.0717 |
| <b>P(D)=0.1, h<sup>2</sup>=0.02, MAF=0.2</b> |        |        |        | <b>P(D)=0.1, h<sup>2</sup>=0.02, MAF=0.5</b> |        |        |        |
| DME-11                                       | AA     | Aa     | aa     | DME-12                                       | AA     | Aa     | aa     |
| <b>BB</b>                                    | 0.0608 | 0.1459 | 0.1459 | <b>BB</b>                                    | 0.0671 | 0.1548 | 0.1548 |
| <b>Bb</b>                                    | 0.1459 | 0.0608 | 0.0608 | <b>Bb</b>                                    | 0.1548 | 0.0671 | 0.0671 |
| <b>bb</b>                                    | 0.1459 | 0.0608 | 0.0608 | <b>bb</b>                                    | 0.1548 | 0.0671 | 0.0671 |

\* P(D) is prevalence, h<sup>2</sup> is heritability, and MAF stands for minor allele frequency.

#### 4. Analysis of performance indicators for simulation experiments

##### 4.1 TPR, PPV, ACC, FDR, and F1 values for DNME disease models

The specific experimental results of TPR, PPV, ACC, FDR and F1 for 12 of these DNME models are shown in Table S3.

**Table S4.** TPR, PPV, ACC, FDR, and F1 values for DNME disease models

| algorithms   | indicators | DNM<br>E1 | DNM<br>E2 | DNM<br>E3 | DNM<br>E4 | DNM<br>E5 | DNM<br>E6 | DNM<br>E7 | DNM<br>E8 | DNM<br>E9 | DNM<br>E10 |
|--------------|------------|-----------|-----------|-----------|-----------|-----------|-----------|-----------|-----------|-----------|------------|
| SEMO         | TPR        | 1.00      | 0.16      | 1.00      | 0.32      | 1.00      | 0.86      | 0.12      | 1.00      | 0.79      | 0.53       |
|              | SPC        | 0.00      | 1.00      | 1.00      | 1.00      | 1.00      | 1.00      | 1.00      | 1.00      | 1.00      | 1.00       |
|              | PPV        | 1.00      | 1.00      | 1.00      | 1.00      | 1.00      | 1.00      | 1.00      | 1.00      | 1.00      | 1.00       |
|              | FDR        | 1.00      | 0.52      | 1.00      | 0.41      | 1.00      | 0.87      | 0.57      | 1.00      | 0.80      | 0.57       |
|              | ACC        | 1.00E-12  | 1.11E-11  | 1.02E-12  | 3.57E-12  | 1.04E-12  | 1.25E-12  | 1.67E-11  | 1.05E-12  | 1.35E-12  | 2.04E-12   |
|              | F1         | 1.00      | 0.27      | 1.00      | 0.49      | 1.00      | 0.93      | 0.22      | 1.00      | 0.88      | 0.70       |
| EACO         | TPR        | 1.00      | 0.00      | 1.00      | 0.00      | 1.00      | 1.00      | 0.00      | 1.00      | 0.33      | 0.40       |
|              | SPC        | 1.00      | 1.00      | 1.00      | 1.00      | 1.00      | 1.00      | 1.00      | 1.00      | 1.00      | 1.00       |
|              | PPV        | 1.00      | 0.00      | 1.00      | 0.00      | 1.00      | 1.00      | 0.00      | 1.00      | 1.00      | 1.00       |
|              | FDR        | 1.00      | 0.98      | 1.00      | 0.95      | 1.00      | 1.00      | 0.96      | 1.00      | 0.98      | 0.97       |
|              | ACC        | 5.00E-11  | 1.00      | 5.00E-11  | 1.00      | 2.00E-11  | 5.00E-11  | 1.00      | 3.33E-11  | 1.00E-10  | 5.00E-11   |
|              | F1         | 1.00      | 0.00      | 1.00      | 0.00      | 1.00      | 1.00      | 0.00      | 1.00      | 0.50      | 0.57       |
| EpiACO       | TPR        | 1.00      | 0.00      | 1.00      | 0.43      | 1.00      | 0.83      | 0.00      | 1.00      | 1.00      | 1.00       |
|              | SPC        | 0.99      | 1.00      | 1.00      | 1.00      | 1.00      | 1.00      | 1.00      | 1.00      | 1.00      | 1.00       |
|              | PPV        | 0.83      | 0.00      | 1.00      | 1.00      | 1.00      | 1.00      | 0.00      | 1.00      | 1.00      | 1.00       |
|              | FDR        | 0.99      | 1.00      | 1.00      | 0.96      | 1.00      | 0.99      | 0.97      | 1.00      | 1.00      | 1.00       |
|              | ACC        | 0.17      | 1.00      | 2.00E-11  | 3.33E-11  | 2.00E-11  | 2.00E-11  | 1.00      | 3.33E-11  | 3.33E-11  | 5.00E-11   |
|              | F1         | 0.91      | 0.00      | 1.00      | 0.6       | 1.00      | 0.91      | 0.00      | 1.00      | 1.00      | 1.00       |
| FDHEIW       | TPR        | 0.00      | 0.00      | 1.00      | 0.00      | 0.00      | 0.00      | 0.00      | 0.00      | 0.00      | 0.00       |
|              | SPC        | 0.99      | 1.00      | 0.980     | 0.99      | 0.97      | 0.97      | 0.99      | 0.98      | 0.98      | 0.98       |
|              | PPV        | 0.00      | 0.00      | 0.33      | 0.00      | 0.00      | 0.00      | 0.00      | 0.00      | 0.00      | 0.00       |
|              | FDR        | 0.99      | 1.00      | 0.98      | 0.99      | 0.97      | 0.97      | 0.99      | 0.98      | 0.98      | 0.98       |
|              | ACC        | 1.00      | 1.00      | 0.67      | 1.00      | 1.00      | 1.00      | 1.00      | 1.00      | 1.00      | 1.00       |
|              | F1         | 0.00      | 0.00      | 0.50      | 0.00      | 0.00      | 0.00      | 0.00      | 0.00      | 0.00      | 0.00       |
| MP-HS-DHSI   | TPR        | 1.00      | 0.00      | 1.00      | 0.333     | 1.00      | 0.82      | 0.06      | 1.00      | 0.85      | 0.33       |
|              | SPC        | 0.97      | 1.00      | 0.98      | 0.99      | 0.98      | 0.99      | 0.99      | 0.96      | 0.98      | 0.98       |
|              | PPV        | 0.77      | 0.00      | 0.9       | 0.86      | 0.89      | 0.93      | 0.50      | 0.87      | 0.90      | 0.67       |
|              | FDR        | 0.97      | 0.91      | 0.98      | 0.87      | 0.98      | 0.96      | 0.83      | 0.97      | 0.95      | 0.90       |
|              | ACC        | 0.23      | 1.00      | 0.10      | 0.15      | 0.11      | 0.07      | 0.5       | 0.13      | 0.11      | 0.33       |
|              | F1         | 0.87      | 0.00      | 0.95      | 0.48      | 0.94      | 0.88      | 0.11      | 0.93      | 0.87      | 0.44       |
| NHSA-DHSC    | TPR        | 1.00      | 0.15      | 1.00      | 0.23      | 1.00      | 0.80      | 0.00      | 1.00      | 0.71      | 0.60       |
|              | SPC        | 1.00      | 1.00      | 1.00      | 0.99      | 0.98      | 0.98      | 1.00      | 1.00      | 0.99      | 0.99       |
|              | PPV        | 1.00      | 1.00      | 1.00      | 0.86      | 0.89      | 0.89      | 0.00      | 1.00      | 0.91      | 0.86       |
|              | FDR        | 1.00      | 0.78      | 1.00      | 0.79      | 0.98      | 0.94      | 0.82      | 1.00      | 0.95      | 0.95       |
|              | ACC        | 3.45E-12  | 2.50E-11  | 4.55E-12  | 0.14      | 0.11      | 0.11      | 1.00      | 3.45E-12  | 0.09      | 0.14       |
|              | F1         | 1.00      | 0.27      | 1.00      | 0.36      | 0.94      | 0.84      | 0.00      | 1.00      | 0.80      | 0.71       |
| SNPHarvester | TPR        | 1.00      | 0.00      | 1.00      | 0.67      | 1.00      | 0.00      | 0.00      | 0.00      | 1.00      | 0.00       |
|              | SPC        | 1.00      | 1.00      | 1.00      | 1.00      | 1.00      | 1.00      | 1.00      | 1.00      | 1.00      | 1.00       |
|              | PPV        | 1.00      | 0.00      | 1.00      | 1.00      | 1.00      | 0.00      | 0.00      | 0.00      | 1.00      | 0.00       |
|              | FDR        | 1.00      | 0.96      | 1.00      | 0.99      | 1.00      | 0.97      | 0.99      | 1.00      | 1.00      | 0.99       |
|              | ACC        | 2.50E-11  | 1.00      | 2.50E-11  | 5.00E-11  | 1.00E-10  | 1.00      | 1.00      | 1.00      | 5.00E-11  | 1.00       |
|              | F1         | 1.00      | 0.00      | 1.00      | 0.80      | 1.00      | 0.00      | 0.00      | 0.00      | 1.00      | 0.00       |

## 4.2 TPR, PPV, ACC, FDR, and F1 values for DNME disease models

The specific experimental results of TPR, PPV, ACC, FDR and F1 for 12 of these DNME models are shown in Table S4.

**Table S5.** TPR, PPV, ACC, FDR, and F1 values for DME disease models

| algorithms    | indicators | DME<br>1 | DME<br>2 | DME<br>3 | DME<br>4 | DME<br>5 | DME<br>6 | DME<br>7 | DME<br>8 | DME<br>9 | DME<br>10 | DME<br>11 | DME<br>12 |
|---------------|------------|----------|----------|----------|----------|----------|----------|----------|----------|----------|-----------|-----------|-----------|
| SEMO          | TPR        | 0.03     | 0.03     | 0.03     | 0.17     | 0.40     | 0.85     | 0.99     | 1.00     | 1.00     | 1.00      | 1.00      | 1.00      |
|               | SPC        | 1.00     | 1.00     | 1.00     | 0.97     | 1.00     | 0.67     | 1.00     | 0.00     | 0.00     | 0.00      | 1.00      | 0.00      |
|               | PPV        | 1.00     | 1.00     | 1.00     | 0.71     | 1.00     | 0.99     | 1.00     | 0.99     | 1.00     | 1.00      | 1.00      | 1.00      |
|               | ACC        | 0.64     | 0.70     | 0.62     | 0.73     | 0.430    | 0.84     | 0.99     | 0.99     | 1.00     | 1.00      | 1.00      | 1.00      |
|               | FDR        | 1.00     | 1.00     | 1.00     | 2.63     | 1.03     | 0.01     | 1.03     | 1.00     | 1.00     | 1.01      | 1.00      | 1.00      |
|               |            | E-10     | E-10     | E-10     | 0.29     | E-12     | 0.01     | E-12     | 0.01     | E-12     | E-12      | E-12      | E-12      |
|               | F1         | 0.05     | 0.06     | 0.05     | 0.27     | 0.57     | 0.91     | 0.99     | 0.99     | 1.00     | 1.00      | 1.00      | 1.00      |
| EACO          | TPR        | 0.00     | 0.00     | 0.00     | 0.00     | 0.00     | 0.75     | 1.00     | 1.00     | 0.00     | 1.00      | 1.00      | 1.00      |
|               | SPC        | 1.00     | 1.00     | 1.00     | 0.98     | 0.99     | 0.958    | 0.70     | 0.06     | 0.36     | 0.705     | 1.00      | 0.91      |
|               | PPV        | 0.00     | 0.00     | 0.00     | 0.00     | 0.00     | 0.43     | 0.12     | 0.13     | 0.00     | 0.15      | 1.00      | 0.18      |
|               | ACC        | 1.00     | 1.00     | 0.98     | 0.98     | 0.99     | 0.95     | 0.710    | 0.17     | 0.36     | 0.72      | 1.00      | 0.91      |
|               | FDR        | 1.00     | 1.00     | 1.00     | 1.00     | 1.00     | 5.71     | 8.79     | 8.74     | 1.00     | 8.48      | 5.00      | 0.82      |
|               |            | E+00     | E+00     | E+00     | E+00     | E+00     | E-01     | E-01     | E-01     | E+00     | E-01      | E-11      | 0.82      |
|               | F1         | 0.00     | 0.00     | 0.00     | 0.00     | 0.00     | 0.55     | 0.22     | 0.22     | 0.00     | 0.26      | 1.00      | 0.31      |
| EpiACO        | TPR        | 0.00     | 0.00     | 0.00     | 0.00     | 0.50     | 0.00     | 1.00     | 1.00     | 1.00     | 1.00      | 1.00      | 1.00      |
|               | SPC        | 1.00     | 1.00     | 1.00     | 1.00     | 1.00     | 0.97     | 0.79     | 0.06     | 0.50     | 0.80      | 1.00      | 0.93      |
|               | PPV        | 0.00     | 0.00     | 0.00     | 0.00     | 1.00     | 0.00     | 0.30     | 0.52     | 0.13     | 0.17      | 1.00      | 0.22      |
|               | ACC        | 1.00     | 1.00     | 0.99     | 1.00     | 0.99     | 0.97     | 0.81     | 0.53     | 0.53     | 0.81      | 1.00      | 0.93      |
|               | FDR        | 1.00     | 1.00     | 1.00     | 1.00     | 1.00     | 1.00     | 0.70     | 0.49     | 0.87     | 0.83      | 1.00      | 0.78      |
|               |            |          |          |          |          | E-10     |          |          |          |          |           | E-10      |           |
|               | F1         | 0.00     | 0.00     | 0.00     | 0.00     | 0.67     | 0.00     | 0.46     | 0.68     | 0.23     | 0.30      | 1.00      | 0.36      |
| FDHEIW        | TPR        | 0.00     | 0.33     | 0.25     | 0.71     | 0.57     | 0.92     | 1.00     | 1.00     | 1.00     | 1.00      | 1.00      | 1.00      |
|               | SPC        | 0.93     | 0.95     | 0.97     | 0.88     | 1.00     | 0.92     | 0.40     | 0.00     | 0.00     | 1.00      | 0.99      | 0.97      |
|               | PPV        | 0.00     | 0.17     | 0.25     | 0.31     | 1.00     | 0.97     | 0.97     | 1.00     | 0.98     | 1.00      | 0.97      | 0.99      |
|               | ACC        | 0.87     | 0.93     | 0.94     | 0.87     | 0.8      | 0.92     | 0.97     | 1.00     | 0.98     | 1.00      | 0.99      | 0.99      |
|               | FDR        | 1.00     | 0.83     | 0.75     | 0.69     | 3.85     | 0.03     | 0.03     | 1.00     | 0.02     | 1.02      | 0.03      | 0.02      |
|               |            |          |          |          |          | E-12     |          |          | E-12     |          | E-12      |           |           |
|               | F1         | 0.00     | 0.22     | 0.25     | 0.44     | 0.72     | 0.94     | 0.98     | 1.00     | 0.99     | 1.00      | 0.98      | 0.99      |
| MP-HS-DHSI    | TPR        | 0.03     | 0.03     | 0.03     | 0.09     | 0.47     | 0.86     | 0.99     | 1.00     | 1.00     | 1.00      | 1.00      | 1.00      |
|               | SPC        | 0.90     | 0.94     | 0.98     | 0.90     | 1.00     | 1.00     | 0.33     | 0.00     | 1.00     | 1.00      | 0.98      | 0.9       |
|               | PPV        | 0.13     | 0.20     | 0.5      | 0.67     | 1.00     | 1.00     | 0.98     | 1.00     | 1.00     | 1.00      | 0.98      | 0.99      |
|               | ACC        | 0.65     | 0.61     | 0.64     | 0.32     | 0.7      | 0.88     | 0.97     | 1.00     | 1.00     | 1.00      | 0.99      | 0.99      |
|               | FDR        | 0.88     | 0.80     | 0.50     | 0.33     | 3.70     | 1.35     | 0.02     | 1.00     | 1.01     | 1.01      | 0.02      | 0.01      |
|               |            |          |          |          |          | E-12     | E-12     |          | E-12     | E-12     | E-12      |           |           |
|               | F1         | 0.05     | 0.05     | 0.05     | 0.15     | 0.64     | 0.93     | 0.99     | 1.00     | 1.00     | 1.00      | 0.99      | 0.99      |
| NHSA-DHSC     | TPR        | 0.00     | 0.03     | 0.09     | 0.18     | 0.45     | 0.82     | 0.99     | 1.00     | 1.00     | 1.00      | 1.00      | 1.00      |
|               | SPC        | 0.97     | 0.96     | 1.00     | 0.94     | 1.00     | 0.91     | 0.00     | 0.00     | 1.00     | 1.00      | 1.00      | 0.91      |
|               | PPV        | 0.00     | 0.25     | 1.00     | 0.75     | 1.00     | 0.99     | 0.99     | 1.00     | 1.00     | 1.00      | 1.00      | 0.98      |
|               | ACC        | 0.62     | 0.66     | 0.71     | 0.55     | 0.64     | 0.83     | 0.98     | 1.00     | 1.00     | 1.00      | 1.00      | 0.98      |
|               | FDR        | 1.00     | 0.75     | 3.33     | 0.25     | 3.45     | 0.01     | 0.01     | 1.00     | 1.01     | 1.02      | 2.44      | 0.03      |
|               |            |          |          | E-11     |          | E-12     |          |          | E-12     | E-12     | E-12      | E-12      |           |
|               | F1         | 0.00     | 0.06     | 0.17     | 0.29     | 0.62     | 0.90     | 0.99     | 1.00     | 1.00     | 1.00      | 1.00      | 0.99      |
| SNPHar-vestor | TPR        | 0.00     | 0.00     | 0.00     | 0.00     | 0.29     | 0.41     | 0.80     | 0.98     | 0.95     | 0.94      | 0.97      | 0.95      |
|               | SPC        | 1.00     | 1.00     | 1.00     | 1.00     | 1.00     | 1.00     | 1.00     | 0.00     | 0.00     | 1.00      | 1.00      | 1.00      |
|               | PPV        | 0.00     | 0.00     | 0.00     | 0.00     | 1.00     | 1.00     | 1.00     | 1.00     | 1.00     | 1.00      | 1.00      | 1.00      |
|               | ACC        | 1.00     | 0.98     | 0.90     | 0.89     | 0.85     | 0.56     | 0.80     | 0.98     | 0.95     | 0.94      | 0.99      | 0.95      |
|               | FDR        | 1.00     | 1.00     | 1.00     | 1.00     | 1.67     | 3.23     | 1.28     | 1.02     | 1.05     | 1.08      | 2.70      | 1.16      |
|               |            |          |          |          |          | E-11     | E-12     | E-12     | E-12     | E-12     | E-12      | E-12      | E-12      |
|               | F1         | 0.00     | 0.00     | 0.00     | 0.00     | 0.44     | 0.59     | 0.89     | 0.99     | 0.97     | 0.97      | 0.99      | 0.97      |
